# Supplementary material for: Fast preparation and growth mechanism of erythrocyte-like Cd2Ge2O6 superstructures via a microwave-hydrothermal process
Source: Royal Society of Chemistry journal article supplement (doi:10.1039/c0ce00872a), 2011-01-01
Supplement: c0ce00872a.pdf [file c0ce00872a.pdf]

## Supporting Information

### Fast preparation and growth mechanism of erythrocyte-like $\text{Cd}_2\text{Ge}_2\text{O}_6$ superstructures via a microwave-hydrothermal process

Lei Zhang,<sup>a</sup> Xiao-Feng Cao,<sup>a</sup> Xue-Tai Chen\*<sup>a</sup> and Zi-Ling Xue<sup>b</sup>

<sup>a</sup> State Key Laboratory of Coordination Chemistry, Nanjing National Laboratory of Microstructures, School of Chemistry and Chemical Engineering, Nanjing University, Nanjing 210093, P. R. China. E-mail:

[xtchen@netra.nju.edu.cn](mailto:xtchen@netra.nju.edu.cn); Fax: +86-25-83314502.

<sup>b</sup> Department of Chemistry, The University of Tennessee, Knoxville, Tennessee 37996-1600, USA.

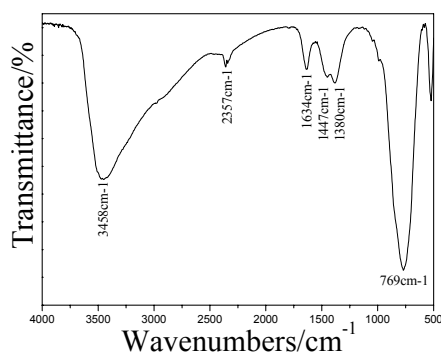

Figure S1 The FT-IR spectrum of the as-prepared  $\text{Cd}_2\text{Ge}_2\text{O}_6$  erythrocyte-like superstructures.

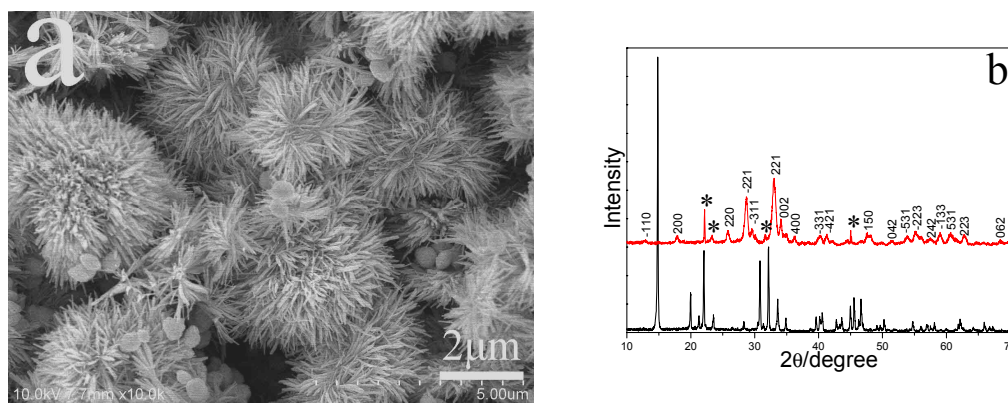

Figure S2 The SEM image (a) and XRD (b, upper) pattern of the product obtained with  $\text{CdCl}_2 \cdot 2.5\text{H}_2\text{O}$  as cadmium source at 180 °C for 10 min (\* : impurity); (b, down) The XRD pattern of the product obtained from the mixing of  $\text{CdCl}_2 \cdot 2.5\text{H}_2\text{O}$  solution and hydrazine.

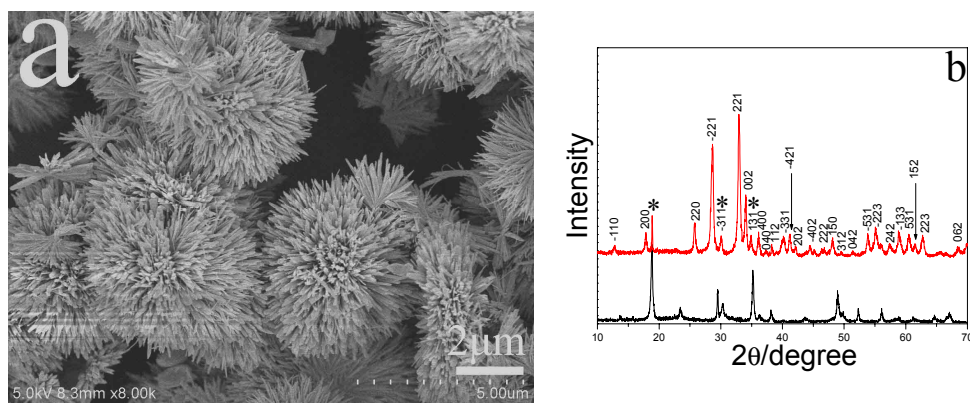

Figure S3 The SEM image (a) and XRD (b, upper) pattern of the product obtained with  $\text{Cd}(\text{NO}_3)_2 \cdot 2.4\text{H}_2\text{O}$  as cadmium source at 180 °C for 10 min (\* : impurity); (b, down) The XRD pattern of the product obtained from the mixing of  $\text{Cd}(\text{NO}_3)_2 \cdot 2.4\text{H}_2\text{O}$  solution and hydrazine.

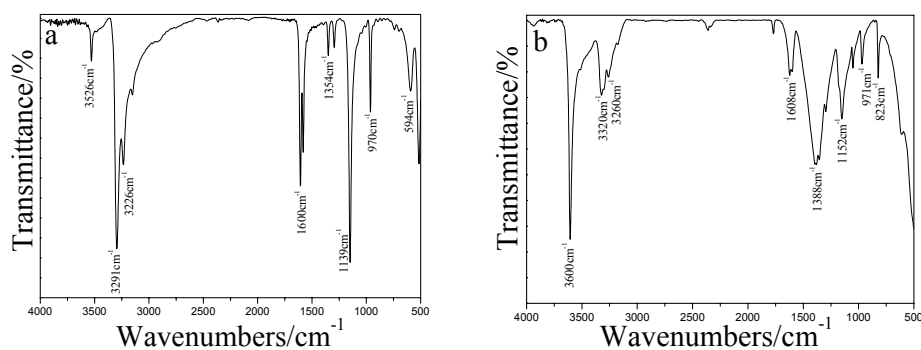

Figure S4 The FT-IR spectra of the products obtained from the mixing of different cadmium source and hydrazine monohydrate: (a)  $\text{CdCl}_2 \cdot 2.5\text{H}_2\text{O}$  and  $\text{Cd}(\text{NO}_3)_2 \cdot 2.4\text{H}_2\text{O}$ .
